# Supplementary material for: Clinical and economic evaluation of modulated electrohyperthermia concurrent to dose-dense temozolomide 21/28 days regimen in the treatment of recurrent glioblastoma: a retrospective analysis of a two-centre German cohort trial with systematic comparison and effect-to-treatment analysis
Source: PubMed Central journal article supplement — BMJ Open. 2017 Nov 3;7(11):e017387. doi: 10.1136/bmjopen-2017-017387 (PMC5722101; doi:10.1136/bmjopen-2017-017387), 2017-11-03
Supplement: bmjopen-2017-017387supp002.pdf [file bmjopen-2017-017387supp002.pdf]

## Supplement 2

### Estimation of the expected mean survival time

First, we defined the expected MOST as 13.65 months. This is a well-established point confirmed either by official SEER data and a reliable retrospective analysis.<sup>1</sup> Then, we defined that median progression-free survival after 1<sup>st</sup>-line treatment, based on the data of 9 cohorts of 6 independent trials (Table S1), equals 7.5 months, and it well corresponds with general opinion that GBM relapses in 6-9 months after diagnosis. To define the most problematic final parameter MST since relapse, we studied the inner structure of the survival time, namely time-proportions between MOST, PFS and MST, on eight cohorts for which this information was available simultaneously (Table S2). Finally, we translated these data on the established MOST and MPFS and calculated the expected MST as 4.775 months (95%CI: 3.9 – 5.6) (Table S3).

*Table S1. Median progression-free survival after standard 1-2 line treatment of GBM (WHO IV).*

| Study                          | Tumor, state               | Treatment          | MPFS m |
|--------------------------------|----------------------------|--------------------|--------|
| Jungk (2016) <sup>2</sup>      | GBM, recurrent/progressive | 2M (mainly no CTX) | 6,10   |
| Reithmeier (2010) <sup>3</sup> | GBM, recurrent/progressive | 3M (mainly TMZ)    | 8,72   |
| Hamza (2014) <sup>4</sup>      | GBM, recurrent/progressive | 3M                 | 8,10   |
| Hamza (2014) <sup>4</sup>      | GBM, recurrent/progressive | 3M                 | 7,60   |
| Strik (2008) <sup>5</sup>      | GBM, recurrent/progressive | 3M Stupp           | 7,53   |
| Chinot (2014) <sup>6</sup>     | GBM, newly diagnosed       | 3M Stupp           | 6,20   |
| Gilbert (2014) <sup>7</sup>    | GBM, newly diagnosed       | 3M Stupp           | 7,30   |
| Gilbert (2013) <sup>8</sup>    | GBM, newly diagnosed       | 3M Stupp           | 7,50   |
| Gilbert (2013) <sup>8</sup>    | GBM, newly diagnosed       | 3M ddTMZ           | 8,80   |
| Average                        |                            |                    | 7,56   |

Note: CTX: chemotherapy; TMZ: temozolomide; 3M – trimodal (SRG + XRT + CTX); 2M: bimodal (no CTX); Stupp: 3M SRG + (XRT 60 Gy X6w + TMZ 5/7d X 6w) + TMZ 5/28d X 6m; ddTMZ: dose-dense TMZ.

Table S2. Inner structure of survival time.

| Study              | Cohort          | NOP | MOST | MPFS | MST  | MST%             | PFS+            | PFS+ |
|--------------------|-----------------|-----|------|------|------|------------------|-----------------|------|
|                    |                 |     |      |      |      |                  | MST             | MST% |
| Varkoniy<br>(2003) | HGG             | 24  | 22,0 | 12,2 | 6,5  | 30%              | 18,7            | 85%  |
| Sahinbas<br>(2007) | GBM (all)       | 76  | 20,0 | 8,5  | 7,6  | 38%              | 16,1            | 80%  |
|                    | GBM (mEHT)      | 18  | 14,8 | 8,0  | 6,4  | 43%              | 14,4            | 97%  |
|                    | GBM mEHT+TMZ)   | 58  | 20,9 | 9,3  | 7,6  | 36%              | 16,9            | 81%  |
| Jungk<br>(2016)    | GBM             | 34  | 15,7 | 6,1  | 8,7  | 56%              | 14,8            | 94%  |
| Hamza<br>(2014)    | GBM (early BEV) | 112 | 20,8 | 8,1  | 11,0 | 53%              | 19,1            | 92%  |
|                    | GBM (late BEV)  | 133 | 25,9 | 7,6  | 9,9  | 38%              | 17,5            | 68%  |
| Strik<br>(2008)    | GBM             | 18  | 17,9 | 8,2  | 9,1  | 51%              | 17,3            | 97%  |
| Weighted average   |                 |     | 21,5 | 8,2  | 9,1  | 43%              | 17,3            | 82%  |
| 95%CI              |                 |     |      |      |      | 36,9% –<br>48,8% | 75,3%–<br>88,8% |      |

Note: NOP: number of patients; MOST: median overall survival time; MPFS: median progression-free survival; MST: median survival time since relapse; PFS: progression-free survival; HGG: high-grade gliomas; GBM: glioblastoma; mEHT: modulated electro-hyperthermia; TMZ: temozolomide; BEV: bevacizumab; CI: confidence interval.

Table S3. Calculation of estimated mean survival time since relapse.

|                                          | Mean  | 95% CI      |             | SE |
|------------------------------------------|-------|-------------|-------------|----|
|                                          |       | Lower limit | Upper limit |    |
| MOST, months                             | 13,65 |             |             |    |
| MPFS, months                             | 7,5   |             |             |    |
| MPFS+MST (%)                             | 82,0% | 75,3%       | 88,8%       |    |
| MPFS+MST, months                         | 11,2  | 10,3        | 12,1        |    |
| mST (1 <sup>st</sup> estimation), months | 3,7   | 2,8         | 4,6         |    |
| MST (%)                                  | 42,9% | 36,9%       | 48,8%       |    |

|                                          | Mean         | 95% CI      |             | SE           |
|------------------------------------------|--------------|-------------|-------------|--------------|
|                                          |              | Lower limit | Upper limit |              |
| MST (2 <sup>nd</sup> estimation), months | 5,9          | 5,0         | 6,7         |              |
| <b>mST (average), months</b>             | <b>4,775</b> | <b>3,9</b>  | <b>5,6</b>  | <b>0,443</b> |

Note: MOST: median overall survival time; MPFS: median progression-free survival; MST: median survival time since relapse.

- <sup>1</sup> Ray S, Bonafede MM, Mohile NA. Treatment Patterns, Survival, and Healthcare Costs of Patients with Malignant Gliomas in a Large US Commercially Insured Population. *Am Health Drug Benefits*. 2014 May; 7(3): 140–149.
- <sup>2</sup> Jungk C, Chatziaslanidou D, Ahmadi R, Capper D, Bermejo JL, Exner J, von Deimling A, Herold-Mende C, Unterberg A. Chemotherapy with BCNU in recurrent glioma: Analysis of clinical outcome and side effects in chemotherapy-naïve patients. *BMC Cancer*. 2016 Feb 10;16:81. doi: 10.1186/s12885-016-2131-6.
- <sup>3</sup> Reithmeier T, Graf E, Piroth T, Trippel M, Pinsky MO, Nikkiah G. BCNU for recurrent glioblastoma multiforme: efficacy, toxicity and prognostic factors. *BMC Cancer*. 2010 Feb 2;10:30. doi: 10.1186/1471-2407-10-30.
- <sup>4</sup> Hamza MA, Mandel JJ, Conrad CA, Gilbert MR, Yung WK, Puduvalli VK, DeGroot JF. Survival outcome of early versus delayed bevacizumab treatment in patients with recurrent glioblastoma. *J Neurooncol*. 2014 Aug;119(1):135-40. doi: 10.1007/s11060-014-1460-z.
- <sup>5</sup> Strik HM, Buhk JH, Wrede A, Hoffmann AL, Bock HC, Christmann M, Kaina B. Rechallenge with temozolomide with different scheduling is effective in recurrent malignant gliomas. *Mol Med Rep*. 2008 Nov-Dec;1(6):863-7. doi: 10.3892/mmr\_00000042.
- <sup>6</sup> Chinot OL, Wick W, Mason W, Henriksson R, Saran F, Nishikawa R, Carpentier AF, Hoang-Xuan K, Kavan P, Cernea D, Brandes AA, Hilton M, Abrey L, Cloughesy T. Bevacizumab plus radiotherapy-temozolomide for newly diagnosed glioblastoma. *N Engl J Med*. 2014 Feb 20;370(8):709-22. doi: 10.1056/NEJMoa1308345.
- <sup>7</sup> Gilbert MR, Dignam JJ, Armstrong TS, Wefel JS, Blumenthal DT, Vogelbaum MA, Colman H, Chakravarti A, Pugh S, Won M, Jeraj R, Brown PD, Jaeckle KA, Schiff D, Stieber VW, Brachman DG, Werner-Wasik M, Tremont-Lukats IW, Sulman EP, Aldape KD, Curran WJ Jr, Mehta MP. A randomized trial of bevacizumab for newly diagnosed glioblastoma. *N Engl J Med*. 2014 Feb 20;370(8):699-708. doi: 10.1056/NEJMoa1308573.
- <sup>8</sup> Gilbert MR, Wang M, Aldape KD, Stupp R, Hegi ME, Jaeckle KA, Armstrong TS, Wefel JS, Won M, Blumenthal DT, Mahajan A, Schultz CJ, Erridge S, Baumert B, Hopkins KI, Tzuk-Shina T, Brown PD, Chakravarti A, Curran WJ Jr, Mehta MP. Dose-dense temozolomide for newly diagnosed glioblastoma: a randomized phase III clinical trial. *J Clin Oncol*. 2013 Nov 10; 31(32):4085-91.
